# Supplementary material
Source: publisher figshare collection journal article supplement (https://acs.figshare.com/ndownloader/files/5777394)
Supplement: Supplementary file 1 [file 5777394]

HEADER
REMARK b3lyp/6-31G* opt
HETATM    1  C           1       0.000   0.000   0.000
HETATM    2  C           1       0.000   0.000   1.397
HETATM    3  C           1       1.205   0.000  -0.704
HETATM    4  H           1      -0.940  -0.005  -0.546
HETATM    5  C           1       1.211  -0.007   2.092
HETATM    6  C           1       2.407   0.005   0.003
HETATM    7  H           1      -0.940  -0.002   1.941
HETATM    8  H           1       1.225  -0.017  -1.790
HETATM    9  O           1       3.610  -0.067  -0.695
HETATM   10  C           1       2.422  -0.007   1.397
HETATM   11  H           1       1.217  -0.018   3.178
HETATM   12  C           1       4.300   1.061  -1.090
HETATM   13  H           1       3.374  -0.030   1.920
HETATM   14  C           1       3.697   2.403  -0.736
HETATM   15  O           1       5.333   0.912  -1.688
HETATM   16  H           1       4.359   3.181  -1.116
HETATM   17  H           1       3.584   2.511   0.348
HETATM   18  H           1       2.701   2.517  -1.175
CONECT    1    2    3    4
CONECT    2    1    5    7
CONECT    3    1    6    8
CONECT    4    1
CONECT    5    2   10   11
CONECT    6    3    9   10
CONECT    7    2
CONECT    8    3
CONECT    9    6   12
CONECT   10    5    6   13
CONECT   11    5
CONECT   12    9   14   15
CONECT   13   10
CONECT   14   12   16   17   18
CONECT   15   12
CONECT   16   14
CONECT   17   14
CONECT   18   14
END
